# Supplementary material for: High vaccine effectiveness against severe Covid-19 in the elderly in Finland before and after the emergence of Omicron
Source: bioRxiv or medRxiv preprint supplement (doi:10.1101/2022.03.11.22272140), 2022-07-06

# Supplementary Data

|                                                                                                              |    |
|--------------------------------------------------------------------------------------------------------------|----|
| Supplementary Table 1: Enrollment of the study cohort . . . . .                                              | 2  |
| Supplementary Table 2: Distribution of baseline characteristics . . . . .                                    | 3  |
| Supplementary Table 3: Number of days until first dose . . . . .                                             | 4  |
| Supplementary Table 4: Number of Covid-19-related hospital admissions . . . . .                              | 5  |
| Supplementary Table 5: Number of Covid-19-related ICU admissions . . . . .                                   | 6  |
| Supplementary Table 6: VE against Covid-19-related hospital admission . . . . .                              | 7  |
| Supplementary Table 7: VE against Covid-19-related ICU admission . . . . .                                   | 8  |
| Supplementary Table 8: VE against Covid-19-related hospital admission by age group . . . . .                 | 9  |
| Supplementary Table 9: VE against Covid-19-related hospital admission by presence of comorbidities . . . . . | 10 |
| Supplementary Table 10: VE against Covid-19-related hospital admission in 2021 Q4 . . . . .                  | 11 |
| Supplementary Table 11: VE against Covid-19-related hospital admission in 2022 Q1 . . . . .                  | 12 |
| Supplementary Table 12: Negative control outcome analysis . . . . .                                          | 13 |
| Supplementary Figure 1: Distribution of SARS-CoV-2 variants by calendar month . . . . .                      | 14 |
| Supplementary Figure 2: Distribution of exposure states by calendar month . . . . .                          | 15 |
| Supplementary Figure 3: Number of cases by calendar month . . . . .                                          | 16 |

**Supplementary Table 1: Enrollment of the study cohort** Individuals were excluded if they had experienced any of the listed events prior to the start of the study.

|                                                                 | Number of individuals |
|-----------------------------------------------------------------|-----------------------|
| Target population                                               | 899796                |
| Excluded due to prior laboratory-confirmed SARS-CoV-2 infection | 1861                  |
| Excluded due to prior Covid-19-related hospital admission       | <5                    |
| Excluded due to prior Covid-19-related ICU admission            | <5                    |
| Excluded due to prior Covid-19 vaccination                      | <5                    |
| Study cohort                                                    | 897932                |

Supplementary Table 2: Distribution of baseline characteristics

|                                                  | n      | %  |
|--------------------------------------------------|--------|----|
| <b>Age in years</b>                              |        |    |
| 70-79                                            | 583684 | 65 |
| 80-89                                            | 257634 | 29 |
| 90-115                                           | 56614  | 6  |
| <b>Sex</b>                                       |        |    |
| Male                                             | 382545 | 43 |
| Female                                           | 515387 | 57 |
| <b>Region of residence</b>                       |        |    |
| Helsinki-Uusimaa                                 | 216074 | 24 |
| Åland                                            | 4902   | 1  |
| Northern and Eastern Finland                     | 223210 | 25 |
| Southern Finland                                 | 214453 | 24 |
| Western Finland                                  | 239293 | 27 |
| <b>In long-term care</b>                         |        |    |
| No                                               | 846793 | 94 |
| Yes                                              | 51139  | 6  |
| <b>Influenza vaccination in 2019–2020</b>        |        |    |
| No                                               | 395797 | 44 |
| Yes                                              | 502135 | 56 |
| <b>Nights hospitalized between 2015 and 2019</b> |        |    |
| 0                                                | 461810 | 51 |
| 1-5                                              | 191654 | 21 |
| 6-20                                             | 137738 | 15 |
| 21+                                              | 106730 | 12 |
| <b>Presence of comorbidities</b>                 |        |    |
| No predisposing comorbidities                    | 375661 | 42 |
| Moderately predisposing comorbidities only       | 203598 | 23 |
| At least 1 highly predisposing comorbidity       | 318673 | 35 |
| <b>Presence of particular comorbidities</b>      |        |    |
| Diabetes mellitus type 2                         | 198173 | 22 |
| Heart failure or ischemic heart disease          | 170420 | 19 |
| Malignant neoplasms                              | 112630 | 13 |
| Asthma                                           | 75791  | 8  |
| Chronic pulmonary disease                        | 27474  | 3  |
| Chronic renal disease                            | 22174  | 2  |
| Hematologic malignancy                           | 15317  | 2  |
| Diseases of myoneural junction and muscle        | 5837   | 1  |
| Organ or stem cell transplant                    | 2189   | 0  |
| Cerebral palsy or other paralytic syndromes      | 1993   | 0  |
| Severe disorders of the immune system            | 1462   | 0  |

**Supplementary Table 3: Number of days until first dose** Distribution of the number of days until the receipt of the first dose in the study of vaccine effectiveness against Covid-19-related hospital admission.

|                                                  | Percentile |      |      |
|--------------------------------------------------|------------|------|------|
|                                                  | 25th       | 50th | 75th |
| <b>Age in years</b>                              |            |      |      |
| 70-79                                            | 80         | 92   | 102  |
| 80-89                                            | 50         | 60   | 73   |
| 90-115                                           | 32         | 52   | 66   |
| <b>Sex</b>                                       |            |      |      |
| Male                                             | 66         | 86   | 100  |
| Female                                           | 60         | 80   | 94   |
| <b>Region of residence</b>                       |            |      |      |
| Helsinki-Uusimaa                                 | 59         | 80   | 93   |
| Åland                                            | 48         | 69   | 84   |
| Northern and Eastern Finland                     | 62         | 82   | 101  |
| Southern Finland                                 | 65         | 85   | 100  |
| Western Finland                                  | 64         | 81   | 95   |
| <b>In long-term care</b>                         |            |      |      |
| No                                               | 66         | 83   | 96   |
| Yes                                              | 23         | 26   | 43   |
| <b>Influenza vaccination in 2019–2020</b>        |            |      |      |
| No                                               | 64         | 86   | 102  |
| Yes                                              | 61         | 80   | 94   |
| <b>Nights hospitalized between 2015 and 2019</b> |            |      |      |
| 0                                                | 68         | 87   | 101  |
| 1-5                                              | 65         | 81   | 95   |
| 6-20                                             | 58         | 74   | 93   |
| 21+                                              | 38         | 61   | 87   |
| <b>Presence of comorbidities</b>                 |            |      |      |
| No predisposing comorbidities                    | 66         | 86   | 100  |
| Moderately predisposing comorbidities only       | 59         | 79   | 94   |
| At least 1 highly predisposing comorbidity       | 60         | 80   | 95   |

**Supplementary Table 4: Number of Covid-19-related hospital admissions** by vaccine, dose and days since last vaccination. The table shows the number of cases and person-years, the cumulative risk (per 100000) at the end of the study estimated based on the Kaplan-Meier estimator, the number of study subjects who contributed person-time, the number of study subjects who were censored before the end of the study and the number of study subjects who were still considered at risk at the end of the study. Study subjects may have passed through multiple exposure states before becoming cases or being censored.

|                                         | Cases | P-years | Risk | Subjects | Censored | At risk |
|-----------------------------------------|-------|---------|------|----------|----------|---------|
| Not vaccinated                          | 637   | 241629  | 888  | 897931   | 18190    | 35987   |
| Comirnaty 0-20                          | 47    | 40813   | 448  | 710603   | 1269     | 381     |
| Comirnaty 21-83                         | 77    | 114794  | 477  | 694803   | 6367     | 1863    |
| Comirnaty 84+                           | 24    | 9752    | 316  | 82420    | 4880     | 4177    |
| Comirnaty + Comirnaty 0-13              | 7     | 26498   | 149  | 691666   | 628      | 364     |
| Comirnaty + Comirnaty 14-90             | 30    | 143799  | 80   | 690669   | 7978     | 12847   |
| Comirnaty + Comirnaty 91-180            | 193   | 156943  | 148  | 669079   | 9321     | 10327   |
| Comirnaty + Comirnaty 181+              | 148   | 28696   | 265  | 501828   | 6729     | 26424   |
| Comirnaty + Comirnaty + Comirnaty 0-13  | 38    | 20826   | 75   | 544671   | 585      | 2924    |
| Comirnaty + Comirnaty + Comirnaty 14-60 | 79    | 64209   | 28   | 541162   | 6448     | 142486  |
| Comirnaty + Comirnaty + Comirnaty 61+   | 66    | 22182   | 60   | 392228   | 5959     | 386269  |
| Comirnaty + Comirnaty + Spikevax 0-13   | 9     | 2760    | 54   | 72377    | 69       | 934     |
| Comirnaty + Comirnaty + Spikevax 14-60  | 13    | 6544    | 73   | 71374    | 482      | 57762   |
| Comirnaty + Comirnaty + Spikevax 61+    | 7     | 516     | 259  | 13130    | 320      | 12810   |
| Spikevax 0-20                           | <5    | 4905    | 381  | 85402    | 169      | 77      |
| Spikevax 21-83                          | 10    | 13876   | 465  | 85127    | 2338     | 638     |
| Spikevax 84+                            | 5     | 1604    | 452  | 13729    | 1829     | 790     |
| Spikevax + Spikevax 0-13                | <5    | 3047    | 9    | 79561    | 76       | 72      |
| Spikevax + Spikevax 14-90               | <5    | 16454   | 56   | 79412    | 1084     | 1944    |
| Spikevax + Spikevax 91-180              | 30    | 17576   | 84   | 76213    | 1274     | 1973    |
| Spikevax + Spikevax 181+                | 14    | 2962    | 151  | 52841    | 625      | 3459    |
| Spikevax + Spikevax + Comirnaty 0-13    | <5    | 649     | 108  | 17072    | 31       | 247     |
| Spikevax + Spikevax + Comirnaty 14-60   | <5    | 1924    | 90   | 16794    | 315      | 5313    |
| Spikevax + Spikevax + Comirnaty 61+     | 0     | 544     | 0    | 11166    | 179      | 10987   |
| Spikevax + Spikevax + Spikevax 0-13     | 5     | 1986    | 70   | 51982    | 68       | 363     |
| Spikevax + Spikevax + Spikevax 14-60    | 5     | 5677    | 14   | 51551    | 634      | 21344   |
| Spikevax + Spikevax + Spikevax 61+      | <5    | 1379    | 21   | 29573    | 374      | 29199   |
| Vaxzevria 0-20                          | <5    | 2744    | 14   | 47750    | 45       | 0       |
| Vaxzevria 21-83                         | <5    | 7978    | 7    | 47693    | 5405     | 0       |
| Vaxzevria 84+                           | <5    | 458     | 675  | 5114     | 2788     | 207     |
| Vaxzevria + Vaxzevria 0-13              | 0     | 1506    | 0    | 39305    | 16       | 0       |
| Vaxzevria + Vaxzevria 14-90             | <5    | 8263    | 16   | 39289    | 208      | 0       |
| Vaxzevria + Vaxzevria 91-180            | 23    | 9082    | 205  | 39032    | 400      | 23      |
| Vaxzevria + Vaxzevria 181+              | 16    | 1064    | 280  | 24688    | 273      | 2191    |
| Vaxzevria + Vaxzevria + Comirnaty 0-13  | <5    | 911     | 49   | 23864    | 19       | 251     |
| Vaxzevria + Vaxzevria + Comirnaty 14-60 | <5    | 2535    | 24   | 23594    | 192      | 11827   |
| Vaxzevria + Vaxzevria + Comirnaty 61+   | <5    | 379     | 308  | 11575    | 75       | 11500   |
| Vaxzevria + Vaxzevria + Spikevax 0-13   | <5    | 470     | 30   | 12330    | 6        | 156     |
| Vaxzevria + Vaxzevria + Spikevax 14-60  | 0     | 1117    | 0    | 12168    | 50       | 9517    |
| Vaxzevria + Vaxzevria + Spikevax 61+    | <5    | 63      | 55   | 2601     | 13       | 2588    |

**Supplementary Table 5: Number of Covid-19-related ICU admissions** by vaccine, dose and days since last vaccination. The table shows the number of cases and person-years, the cumulative risk (per 100000) at the end of the study estimated based on the Kaplan-Meier estimator, the number of study subjects who contributed person-time, the number of study subjects who were censored before the end of the study and the number of study subjects who were still considered at risk at the end of the study. Study subjects may have passed through multiple exposure states before becoming cases or being censored.

|                                         | Cases | P-years | Risk | Subjects | Censored | At risk |
|-----------------------------------------|-------|---------|------|----------|----------|---------|
| Not vaccinated                          | 131   | 241644  | 157  | 897931   | 18148    | 36028   |
| Comirnaty 0-20                          | 10    | 40814   | 75   | 710604   | 1242     | 381     |
| Comirnaty 21-83                         | 8     | 114796  | 14   | 694831   | 6378     | 1867    |
| Comirnaty 84+                           | <5    | 9753    | 67   | 82431    | 4890     | 4178    |
| Comirnaty + Comirnaty 0-13              | <5    | 26498   | 2    | 691668   | 624      | 364     |
| Comirnaty + Comirnaty 14-90             | <5    | 143800  | 8    | 690675   | 7974     | 12848   |
| Comirnaty + Comirnaty 91-180            | 24    | 156948  | 13   | 669088   | 9282     | 10329   |
| Comirnaty + Comirnaty 181+              | 14    | 28701   | 23   | 501874   | 6762     | 26436   |
| Comirnaty + Comirnaty + Comirnaty 0-13  | <5    | 20826   | 2    | 544672   | 549      | 2924    |
| Comirnaty + Comirnaty + Comirnaty 14-60 | 9     | 64212   | 2    | 541199   | 6459     | 142491  |
| Comirnaty + Comirnaty + Comirnaty 61+   | 8     | 22183   | 52   | 392249   | 5952     | 386297  |
| Comirnaty + Comirnaty + Spikevax 0-13   | <5    | 2760    | 15   | 72377    | 61       | 934     |
| Comirnaty + Comirnaty + Spikevax 14-60  | <5    | 6544    | 9    | 71382    | 488      | 57763   |
| Comirnaty + Comirnaty + Spikevax 61+    | 0     | 516     | 0    | 13131    | 319      | 12812   |
| Spikevax 0-20                           | 0     | 4905    | 0    | 85402    | 166      | 77      |
| Spikevax 21-83                          | <5    | 13876   | 4    | 85130    | 2341     | 638     |
| Spikevax 84+                            | 0     | 1604    | 0    | 13729    | 1829     | 790     |
| Spikevax + Spikevax 0-13                | 0     | 3047    | 0    | 79561    | 75       | 72      |
| Spikevax + Spikevax 14-90               | 0     | 16455   | 0    | 79413    | 1084     | 1944    |
| Spikevax + Spikevax 91-180              | <5    | 17577   | 2    | 76214    | 1271     | 1973    |
| Spikevax + Spikevax 181+                | 0     | 2963    | 0    | 52845    | 629      | 3459    |
| Spikevax + Spikevax + Comirnaty 0-13    | 0     | 650     | 0    | 17072    | 29       | 247     |
| Spikevax + Spikevax + Comirnaty 14-60   | 0     | 1924    | 0    | 16796    | 317      | 5313    |
| Spikevax + Spikevax + Comirnaty 61+     | 0     | 544     | 0    | 11166    | 179      | 10987   |
| Spikevax + Spikevax + Spikevax 0-13     | 0     | 1986    | 0    | 51982    | 63       | 363     |
| Spikevax + Spikevax + Spikevax 14-60    | 0     | 5677    | 0    | 51556    | 638      | 21344   |
| Spikevax + Spikevax + Spikevax 61+      | 0     | 1379    | 0    | 29574    | 371      | 29203   |
| Vaxzevria 0-20                          | 0     | 2744    | 0    | 47750    | 42       | 0       |
| Vaxzevria 21-83                         | <5    | 7979    | 4348 | 47696    | 5409     | 0       |
| Vaxzevria 84+                           | 0     | 458     | 0    | 5113     | 2787     | 207     |
| Vaxzevria + Vaxzevria 0-13              | 0     | 1506    | 0    | 39305    | 16       | 0       |
| Vaxzevria + Vaxzevria 14-90             | <5    | 8263    | 10   | 39289    | 208      | 0       |
| Vaxzevria + Vaxzevria 91-180            | 5     | 9083    | 13   | 39032    | 397      | 23      |
| Vaxzevria + Vaxzevria 181+              | <5    | 1065    | 71   | 24691    | 276      | 2191    |
| Vaxzevria + Vaxzevria + Comirnaty 0-13  | 0     | 912     | 0    | 23864    | 17       | 251     |
| Vaxzevria + Vaxzevria + Comirnaty 14-60 | 0     | 2536    | 0    | 23596    | 194      | 11827   |
| Vaxzevria + Vaxzevria + Comirnaty 61+   | <5    | 379     | 308  | 11575    | 75       | 11500   |
| Vaxzevria + Vaxzevria + Spikevax 0-13   | 0     | 470     | 0    | 12330    | 5        | 156     |
| Vaxzevria + Vaxzevria + Spikevax 14-60  | 0     | 1117    | 0    | 12169    | 51       | 9517    |
| Vaxzevria + Vaxzevria + Spikevax 61+    | 0     | 63      | 0    | 2601     | 13       | 2588    |

**Supplementary Table 6: VE against Covid-19-related hospital admission** Vaccine effectiveness (in %) quantified as 1 minus the hazard ratio adjusted for age, sex, region of residence, residence in a long-term care facility, influenza vaccination in 2019–2020, number of nights hospitalized between 2015 and 2019 and presence of predisposing comorbidities.

|                                         | MLE | LCI  | UCI | p-value <sup>1</sup> |
|-----------------------------------------|-----|------|-----|----------------------|
| Comirnaty 0-20                          | 49  | 29   | 63  | .                    |
| Comirnaty 21-83                         | 64  | 52   | 73  | .                    |
| Comirnaty 84+                           | 66  | 49   | 78  | .                    |
| Comirnaty + Comirnaty 0-13              | 84  | 67   | 93  | .                    |
| Comirnaty + Comirnaty 14-90             | 93  | 90   | 95  | .                    |
| Comirnaty + Comirnaty 91-180            | 87  | 84   | 89  | .                    |
| Comirnaty + Comirnaty 181+              | 72  | 66   | 77  | .                    |
| Comirnaty + Comirnaty + Comirnaty 0-13  | 91  | 87   | 93  | .                    |
| Comirnaty + Comirnaty + Comirnaty 14-60 | 96  | 95   | 97  | .                    |
| Comirnaty + Comirnaty + Comirnaty 61+   | 92  | 89   | 94  | .                    |
| Comirnaty + Comirnaty + Spikevax 0-13   | 88  | 77   | 94  | .                    |
| Comirnaty + Comirnaty + Spikevax 14-60  | 94  | 89   | 96  | .                    |
| Comirnaty + Comirnaty + Spikevax 61+    | 59  | 13   | 81  | .                    |
| Spikevax 0-20                           | 72  | 26   | 90  | .                    |
| Spikevax 21-83                          | 69  | 41   | 84  | .                    |
| Spikevax 84+                            | 72  | 33   | 89  | .                    |
| Spikevax + Spikevax 0-13                | 86  | 2    | 98  | .                    |
| Spikevax + Spikevax 14-90               | 97  | 88   | 99  | .                    |
| Spikevax + Spikevax 91-180              | 85  | 78   | 90  | .                    |
| Spikevax + Spikevax 181+                | 81  | 67   | 89  | .                    |
| Spikevax + Spikevax + Comirnaty 0-13    | 86  | 42   | 96  | .                    |
| Spikevax + Spikevax + Comirnaty 14-60   | 94  | 83   | 98  | .                    |
| Spikevax + Spikevax + Comirnaty 61+     | 100 | .    | .   | <0.001               |
| Spikevax + Spikevax + Spikevax 0-13     | 91  | 77   | 96  | .                    |
| Spikevax + Spikevax + Spikevax 14-60    | 98  | 95   | 99  | .                    |
| Spikevax + Spikevax + Spikevax 61+      | 93  | 82   | 98  | .                    |
| Vaxzevria 0-20                          | 31  | -120 | 78  | .                    |
| Vaxzevria 21-83                         | 68  | -2   | 90  | .                    |
| Vaxzevria 84+                           | 3   | -161 | 64  | .                    |
| Vaxzevria + Vaxzevria 0-13              | 100 | .    | .   | 0.122                |
| Vaxzevria + Vaxzevria 14-90             | 83  | 53   | 94  | .                    |
| Vaxzevria + Vaxzevria 91-180            | 76  | 62   | 84  | .                    |
| Vaxzevria + Vaxzevria 181+              | 39  | -1   | 63  | .                    |
| Vaxzevria + Vaxzevria + Comirnaty 0-13  | 85  | 53   | 95  | .                    |
| Vaxzevria + Vaxzevria + Comirnaty 14-60 | 97  | 89   | 99  | .                    |
| Vaxzevria + Vaxzevria + Comirnaty 61+   | 91  | 33   | 99  | .                    |
| Vaxzevria + Vaxzevria + Spikevax 0-13   | 92  | 40   | 99  | .                    |
| Vaxzevria + Vaxzevria + Spikevax 14-60  | 100 | .    | .   | <0.001               |
| Vaxzevria + Vaxzevria + Spikevax 61+    | 42  | -319 | 92  | .                    |

MLE, maximum likelihood estimate;

LCI/UCI, lower/upper limit of the 95% Wald confidence interval

<sup>1</sup> Likelihood-ratio test

**Supplementary Table 7: VE against Covid-19-related ICU admission** Vaccine effectiveness (in %) quantified as 1 minus the hazard ratio adjusted for age, sex, region of residence, residence in a long-term care facility, influenza vaccination in 2019–2020, number of nights hospitalized between 2015 and 2019 and presence of predisposing comorbidities.

|                                         | MLE | LCI  | UCI | p-value <sup>1</sup> |
|-----------------------------------------|-----|------|-----|----------------------|
| Comirnaty 0-20                          | 57  | 12   | 79  | .                    |
| Comirnaty 21-83                         | 84  | 62   | 93  | .                    |
| Comirnaty 84+                           | 64  | -2   | 87  | .                    |
| Comirnaty + Comirnaty 0-13              | 74  | -15  | 94  | .                    |
| Comirnaty + Comirnaty 14-90             | 97  | 91   | 99  | .                    |
| Comirnaty + Comirnaty 91-180            | 93  | 88   | 96  | .                    |
| Comirnaty + Comirnaty 181+              | 84  | 70   | 91  | .                    |
| Comirnaty + Comirnaty + Comirnaty 0-13  | 99  | 91   | 100 | .                    |
| Comirnaty + Comirnaty + Comirnaty 14-60 | 97  | 94   | 99  | .                    |
| Comirnaty + Comirnaty + Comirnaty 61+   | 90  | 76   | 96  | .                    |
| Comirnaty + Comirnaty + Spikevax 0-13   | 93  | 50   | 99  | .                    |
| Comirnaty + Comirnaty + Spikevax 14-60  | 89  | 68   | 96  | .                    |
| Comirnaty + Comirnaty + Spikevax 61+    | 100 | .    | .   | 0.061                |
| Spikevax 0-20                           | 100 | .    | .   | 0.017                |
| Spikevax 21-83                          | 67  | -40  | 92  | .                    |
| Spikevax 84+                            | 100 | .    | .   | 0.034                |
| Spikevax + Spikevax 0-13                | 100 | .    | .   | 0.135                |
| Spikevax + Spikevax 14-90               | 100 | .    | .   | <0.001               |
| Spikevax + Spikevax 91-180              | 98  | 83   | 100 | .                    |
| Spikevax + Spikevax 181+                | 100 | .    | .   | <0.001               |
| Spikevax + Spikevax + Comirnaty 0-13    | 100 | .    | .   | 0.026                |
| Spikevax + Spikevax + Comirnaty 14-60   | 100 | .    | .   | <0.001               |
| Spikevax + Spikevax + Comirnaty 61+     | 100 | .    | .   | 0.041                |
| Spikevax + Spikevax + Spikevax 0-13     | 100 | .    | .   | <0.001               |
| Spikevax + Spikevax + Spikevax 14-60    | 100 | .    | .   | <0.001               |
| Spikevax + Spikevax + Spikevax 61+      | 100 | .    | .   | 0.002                |
| Vaxzevria 0-20                          | 100 | .    | .   | 0.079                |
| Vaxzevria 21-83                         | 67  | -163 | 96  | .                    |
| Vaxzevria 84+                           | 100 | .    | .   | 0.173                |
| Vaxzevria + Vaxzevria 0-13              | 100 | .    | .   | 0.518                |
| Vaxzevria + Vaxzevria 14-90             | 77  | 1    | 95  | .                    |
| Vaxzevria + Vaxzevria 91-180            | 82  | 54   | 93  | .                    |
| Vaxzevria + Vaxzevria 181+              | 50  | -64  | 85  | .                    |
| Vaxzevria + Vaxzevria + Comirnaty 0-13  | 100 | .    | .   | 0.002                |
| Vaxzevria + Vaxzevria + Comirnaty 14-60 | 100 | .    | .   | <0.001               |
| Vaxzevria + Vaxzevria + Comirnaty 61+   | 48  | -297 | 93  | .                    |
| Vaxzevria + Vaxzevria + Spikevax 0-13   | 100 | .    | .   | 0.028                |
| Vaxzevria + Vaxzevria + Spikevax 14-60  | 100 | .    | .   | <0.001               |
| Vaxzevria + Vaxzevria + Spikevax 61+    | 100 | .    | .   | 0.460                |

MLE, maximum likelihood estimate;

LCI/UCI, lower/upper limit of the 95% Wald confidence interval

<sup>1</sup> Likelihood-ratio test



**Supplementary Table 8: VE against Covid-19-related hospital admission by age group** Vaccine effectiveness (in %) quantified as 1 minus the hazard ratio stratified by age in years and adjusted for sex, region of residence, residence in a long-term care facility, influenza vaccination in 2019–2020, number of nights hospitalized between 2015 and 2019 and presence of predisposing comorbidities. Estimates marked by an asterisk are statistically significantly different from the corresponding estimates for 70–79-year-olds.

|                                         | 70-79 | 80-89 | 90-115 |
|-----------------------------------------|-------|-------|--------|
| Comirnaty 0-20                          | 48    | 44    | 34     |
| Comirnaty 21-83                         | 71    | 46*   | 77     |
| Comirnaty 84+                           | 64    | 70    | 43     |
| Comirnaty + Comirnaty 0-13              | 88    | 76    | 100    |
| Comirnaty + Comirnaty 14-90             | 95    | 89*   | 93     |
| Comirnaty + Comirnaty 91-180            | 88    | 83*   | 86     |
| Comirnaty + Comirnaty 181+              | 79    | 65*   | 50*    |
| Comirnaty + Comirnaty + Comirnaty 0-13  | 92    | 90    | 64*    |
| Comirnaty + Comirnaty + Comirnaty 14-60 | 97    | 94*   | 93     |
| Comirnaty + Comirnaty + Comirnaty 61+   | 91    | 93    | 82     |
| Comirnaty + Comirnaty + Spikevax 0-13   | 94    | 67*   | 100    |
| Comirnaty + Comirnaty + Spikevax 14-60  | 96    | 88    | 79     |
| Comirnaty + Comirnaty + Spikevax 61+    | 50    | 73    | 18     |
| Spikevax 0-20                           | 60    | 100   | -8     |
| Spikevax 21-83                          | 77    | 82    | -91*   |
| Spikevax 84+                            | 100   | 34    | 100    |
| Spikevax + Spikevax 0-13                | 100   | 61    | 100    |
| Spikevax + Spikevax 14-90               | 100   | 90    | 100    |
| Spikevax + Spikevax 91-180              | 90    | 76*   | 68     |
| Spikevax + Spikevax 181+                | 83    | 76    | 82     |
| Spikevax + Spikevax + Comirnaty 0-13    | 100   | 79    | -55    |
| Spikevax + Spikevax + Comirnaty 14-60   | 92    | 96    | 100    |
| Spikevax + Spikevax + Comirnaty 61+     | 100   | 100   | 100    |
| Spikevax + Spikevax + Spikevax 0-13     | 92    | 93    | 61     |
| Spikevax + Spikevax + Spikevax 14-60    | 100   | 96    | 84     |
| Spikevax + Spikevax + Spikevax 61+      | 96    | 93    | 80     |
| Vaxzevria 0-20                          | 28    | 100   | 100    |
| Vaxzevria 21-83                         | 69    | 100   | 100    |
| Vaxzevria 84+                           | 45    | -237  | 100    |
| Vaxzevria + Vaxzevria 0-13              | 100   | 100   | 100    |
| Vaxzevria + Vaxzevria 14-90             | 87    | 20    | 100    |
| Vaxzevria + Vaxzevria 91-180            | 76    | 100   | 100    |
| Vaxzevria + Vaxzevria 181+              | 44    | 51    | 100    |
| Vaxzevria + Vaxzevria + Comirnaty 0-13  | 86    | 100   | 100    |
| Vaxzevria + Vaxzevria + Comirnaty 14-60 | 98    | 100   | 100    |
| Vaxzevria + Vaxzevria + Comirnaty 61+   | 100   | -188  | 100    |
| Vaxzevria + Vaxzevria + Spikevax 0-13   | 92    | 100   | 100    |
| Vaxzevria + Vaxzevria + Spikevax 14-60  | 100   | 100   | 100    |
| Vaxzevria + Vaxzevria + Spikevax 61+    | 45    | 100   | 100    |

**Supplementary Table 9: VE against Covid-19-related hospital admission by presence of comorbidities** Vaccine effectiveness (in %) quantified as 1 minus the hazard ratio stratified by presence of predisposing comorbidities and adjusted for age, sex, region of residence, residence in a long-term care facility, influenza vaccination in 2019–2020 and number of nights hospitalized between 2015 and 2019. Estimates marked by an asterisk are statistically significantly different from the corresponding estimates for individuals without predisposing comorbidities.

|                                         | None | Moderate | High |
|-----------------------------------------|------|----------|------|
| Comirnaty 0-20                          | 47   | 53       | 46   |
| Comirnaty 21-83                         | 69   | 80       | 53   |
| Comirnaty 84+                           | 62   | 70       | 65   |
| Comirnaty + Comirnaty 0-13              | 100  | 90       | 72   |
| Comirnaty + Comirnaty 14-90             | 93   | 95       | 92   |
| Comirnaty + Comirnaty 91-180            | 92   | 83*      | 84*  |
| Comirnaty + Comirnaty 181+              | 79   | 70       | 68   |
| Comirnaty + Comirnaty + Comirnaty 0-13  | 94   | 90       | 88   |
| Comirnaty + Comirnaty + Comirnaty 14-60 | 99   | 95*      | 94*  |
| Comirnaty + Comirnaty + Comirnaty 61+   | 97   | 91*      | 89*  |
| Comirnaty + Comirnaty + Spikevax 0-13   | 96   | 94       | 81   |
| Comirnaty + Comirnaty + Spikevax 14-60  | 98   | 89       | 93   |
| Comirnaty + Comirnaty + Spikevax 61+    | 100  | 73       | 35   |
| Spikevax 0-20                           | 71   | 100      | 60   |
| Spikevax 21-83                          | 87   | 72       | 57   |
| Spikevax 84+                            | 100  | 29       | 79   |
| Spikevax + Spikevax 0-13                | 100  | 100      | 73   |
| Spikevax + Spikevax 14-90               | 94   | 100      | 97   |
| Spikevax + Spikevax 91-180              | 92   | 84       | 81   |
| Spikevax + Spikevax 181+                | 100  | 75       | 74   |
| Spikevax + Spikevax + Comirnaty 0-13    | 100  | 67       | 86   |
| Spikevax + Spikevax + Comirnaty 14-60   | 100  | 85       | 94   |
| Spikevax + Spikevax + Comirnaty 61+     | 100  | 100      | 100  |
| Spikevax + Spikevax + Spikevax 0-13     | 100  | 73       | 92   |
| Spikevax + Spikevax + Spikevax 14-60    | 100  | 98       | 96   |
| Spikevax + Spikevax + Spikevax 61+      | 100  | 86       | 94   |
| Vaxzevria 0-20                          | 26   | 100      | 4    |
| Vaxzevria 21-83                         | 100  | -11      | 78   |
| Vaxzevria 84+                           | -158 | -39      | 100  |
| Vaxzevria + Vaxzevria 0-13              | 100  | 100      | 100  |
| Vaxzevria + Vaxzevria 14-90             | 100  | 100      | 63   |
| Vaxzevria + Vaxzevria 91-180            | 84   | 89       | 64   |
| Vaxzevria + Vaxzevria 181+              | 77   | 59       | 4    |
| Vaxzevria + Vaxzevria + Comirnaty 0-13  | 100  | 100      | 68   |
| Vaxzevria + Vaxzevria + Comirnaty 14-60 | 100  | 86       | 100  |
| Vaxzevria + Vaxzevria + Comirnaty 61+   | 100  | 100      | 82   |
| Vaxzevria + Vaxzevria + Spikevax 0-13   | 76   | 100      | 100  |
| Vaxzevria + Vaxzevria + Spikevax 14-60  | 100  | 100      | 100  |
| Vaxzevria + Vaxzevria + Spikevax 61+    | 100  | -192     | 100  |

**Supplementary Table 10: VE against Covid-19-related hospital admission in 2021 Q4**, i.e., between October 01 and December 31. Vaccine effectiveness (in %) quantified as 1 minus the hazard ratio adjusted for age, sex, region of residence, residence in a long-term care facility, influenza vaccination in 2019–2020, number of nights hospitalized between 2015 and 2019 and presence of predisposing comorbidities.

|                                         | Cases | P-years | MLE | LCI  | UCI | p-value <sup>1</sup> |
|-----------------------------------------|-------|---------|-----|------|-----|----------------------|
| Not vaccinated                          | 148   | 11060   | .   | .    | .   | .                    |
| Comirnaty 0-20                          | <5    | 413     | 64  | -46  | 91  | .                    |
| Comirnaty 21-83                         | <5    | 776     | 60  | -9   | 85  | .                    |
| Comirnaty 84+                           | 14    | 3351    | 68  | 45   | 82  | .                    |
| Comirnaty + Comirnaty 0-13              | <5    | 759     | 82  | 27   | 96  | .                    |
| Comirnaty + Comirnaty 14-90             | 6     | 4712    | 90  | 78   | 96  | .                    |
| Comirnaty + Comirnaty 91-180            | 156   | 103843  | 89  | 85   | 91  | .                    |
| Comirnaty + Comirnaty 181+              | 73    | 19446   | 78  | 71   | 84  | .                    |
| Comirnaty + Comirnaty + Comirnaty 0-13  | 23    | 16540   | 92  | 88   | 95  | .                    |
| Comirnaty + Comirnaty + Comirnaty 14-60 | 16    | 18320   | 96  | 93   | 98  | .                    |
| Comirnaty + Comirnaty + Comirnaty 61+   | <5    | 1309    | 93  | 71   | 98  | .                    |
| Comirnaty + Comirnaty + Spikevax 0-13   | 0     | 809     | 100 | .    | .   | <0.001               |
| Comirnaty + Comirnaty + Spikevax 14-60  | <5    | 354     | 73  | -8   | 93  | .                    |
| Comirnaty + Comirnaty + Spikevax 61+    | 0     | 100     | 100 | .    | .   | 0.028                |
| Spikevax 0-20                           | 0     | 73      | 100 | .    | .   | 0.142                |
| Spikevax 21-83                          | <5    | 196     | 59  | -192 | 94  | .                    |
| Spikevax 84+                            | <5    | 633     | 91  | 37   | 99  | .                    |
| Spikevax + Spikevax 0-13                | 0     | 131     | 100 | .    | .   | 0.038                |
| Spikevax + Spikevax 14-90               | <5    | 865     | 92  | 42   | 99  | .                    |
| Spikevax + Spikevax 91-180              | 22    | 12412   | 88  | 81   | 93  | .                    |
| Spikevax + Spikevax 181+                | 6     | 2086    | 87  | 70   | 94  | .                    |
| Spikevax + Spikevax + Comirnaty 0-13    | <5    | 481     | 78  | 12   | 95  | .                    |
| Spikevax + Spikevax + Comirnaty 14-60   | <5    | 458     | 82  | 27   | 96  | .                    |
| Spikevax + Spikevax + Comirnaty 61+     | 0     | 15      | 100 | .    | .   | 0.307                |
| Spikevax + Spikevax + Spikevax 0-13     | <5    | 1287    | 93  | 73   | 98  | .                    |
| Spikevax + Spikevax + Spikevax 14-60    | 0     | 1148    | 100 | .    | .   | <0.001               |
| Spikevax + Spikevax + Spikevax 61+      | 0     | 29      | 100 | .    | .   | 0.151                |
| Vaxzevria 0-20                          | 0     | <5      | 100 | .    | .   | 0.951                |
| Vaxzevria 21-83                         | 0     | <5      | 100 | .    | .   | 0.810                |
| Vaxzevria 84+                           | <5    | 194     | 62  | -173 | 95  | .                    |
| Vaxzevria + Vaxzevria 0-13              | 0     | <5      | 100 | .    | .   | 0.898                |
| Vaxzevria + Vaxzevria 14-90             | 0     | 295     | 100 | .    | .   | 0.023                |
| Vaxzevria + Vaxzevria 91-180            | 21    | 8055    | 79  | 66   | 87  | .                    |
| Vaxzevria + Vaxzevria 181+              | 6     | 412     | 20  | -84  | 65  | .                    |
| Vaxzevria + Vaxzevria + Comirnaty 0-13  | <5    | 528     | 89  | 23   | 99  | .                    |
| Vaxzevria + Vaxzevria + Comirnaty 14-60 | <5    | 283     | 83  | -22  | 98  | .                    |
| Vaxzevria + Vaxzevria + Comirnaty 61+   | 0     | 14      | 100 | .    | .   | 0.375                |
| Vaxzevria + Vaxzevria + Spikevax 0-13   | 0     | 157     | 100 | .    | .   | 0.013                |
| Vaxzevria + Vaxzevria + Spikevax 14-60  | 0     | 42      | 100 | .    | .   | 0.175                |
| Vaxzevria + Vaxzevria + Spikevax 61+    | 0     | <5      | 100 | .    | .   | 0.700                |

MLE, maximum likelihood estimate;

LCI/UCI, lower/upper limit of the 95% Wald confidence interval

<sup>1</sup> Likelihood-ratio test

**Supplementary Table 11: VE against Covid-19-related hospital admission in 2022 Q1**, i.e., between January 01 and February 19. Vaccine effectiveness (in %) quantified as 1 minus the hazard ratio adjusted for age, sex, region of residence, residence in a long-term care facility, influenza vaccination in 2019–2020, number of nights hospitalized between 2015 and 2019 and presence of predisposing comorbidities.

|                                         | Cases | P-years | MLE | LCI  | UCI | p-value <sup>1</sup> |
|-----------------------------------------|-------|---------|-----|------|-----|----------------------|
| Not vaccinated                          | 145   | 5121    | .   | .    | .   | .                    |
| Comirnaty 0-20                          | <5    | 100     | 67  | -134 | 95  | .                    |
| Comirnaty 21-83                         | 6     | 330     | 36  | -44  | 72  | .                    |
| Comirnaty 84+                           | 6     | 606     | 62  | 13   | 83  | .                    |
| Comirnaty + Comirnaty 0-13              | <5    | 164     | 79  | -49  | 97  | .                    |
| Comirnaty + Comirnaty 14-90             | 6     | 2148    | 91  | 79   | 96  | .                    |
| Comirnaty + Comirnaty 91-180            | 12    | 1894    | 76  | 56   | 86  | .                    |
| Comirnaty + Comirnaty 181+              | 75    | 6450    | 61  | 48   | 71  | .                    |
| Comirnaty + Comirnaty + Comirnaty 0-13  | 15    | 4227    | 87  | 77   | 92  | .                    |
| Comirnaty + Comirnaty + Comirnaty 14-60 | 63    | 45889   | 95  | 94   | 97  | .                    |
| Comirnaty + Comirnaty + Comirnaty 61+   | 64    | 20872   | 90  | 87   | 93  | .                    |
| Comirnaty + Comirnaty + Spikevax 0-13   | 9     | 1934    | 85  | 70   | 92  | .                    |
| Comirnaty + Comirnaty + Spikevax 14-60  | 11    | 6190    | 94  | 89   | 97  | .                    |
| Comirnaty + Comirnaty + Spikevax 61+    | 7     | 416     | 48  | -13  | 76  | .                    |
| Spikevax 0-20                           | <5    | 40      | 36  | -355 | 91  | .                    |
| Spikevax 21-83                          | <5    | 75      | 64  | -156 | 95  | .                    |
| Spikevax 84+                            | <5    | 122     | 14  | -132 | 68  | .                    |
| Spikevax + Spikevax 0-13                | 0     | 32      | 100 | .    | .   | 0.117                |
| Spikevax + Spikevax 14-90               | <5    | 341     | 92  | 43   | 99  | .                    |
| Spikevax + Spikevax 91-180              | <5    | 362     | 90  | 28   | 99  | .                    |
| Spikevax + Spikevax 181+                | 8     | 860     | 72  | 43   | 86  | .                    |
| Spikevax + Spikevax + Comirnaty 0-13    | 0     | 168     | 100 | .    | .   | 0.002                |
| Spikevax + Spikevax + Comirnaty 14-60   | <5    | 1466    | 96  | 82   | 99  | .                    |
| Spikevax + Spikevax + Comirnaty 61+     | 0     | 529     | 100 | .    | .   | <0.001               |
| Spikevax + Spikevax + Spikevax 0-13     | <5    | 697     | 86  | 56   | 96  | .                    |
| Spikevax + Spikevax + Spikevax 14-60    | 5     | 4529    | 97  | 92   | 99  | .                    |
| Spikevax + Spikevax + Spikevax 61+      | <5    | 1350    | 92  | 79   | 97  | .                    |
| Vaxzevria 21-83                         | 0     | <5      | 100 | .    | .   | 0.894                |
| Vaxzevria 84+                           | <5    | 37      | 8   | -558 | 87  | .                    |
| Vaxzevria + Vaxzevria 14-90             | 0     | <5      | 100 | .    | .   | 0.865                |
| Vaxzevria + Vaxzevria 91-180            | <5    | 140     | 41  | -140 | 86  | .                    |
| Vaxzevria + Vaxzevria 181+              | 10    | 652     | 43  | -10  | 70  | .                    |
| Vaxzevria + Vaxzevria + Comirnaty 0-13  | <5    | 383     | 80  | 19   | 95  | .                    |
| Vaxzevria + Vaxzevria + Comirnaty 14-60 | <5    | 2252    | 98  | 89   | 100 | .                    |
| Vaxzevria + Vaxzevria + Comirnaty 61+   | <5    | 365     | 90  | 27   | 99  | .                    |
| Vaxzevria + Vaxzevria + Spikevax 0-13   | <5    | 313     | 89  | 21   | 98  | .                    |
| Vaxzevria + Vaxzevria + Spikevax 14-60  | 0     | 1075    | 100 | .    | .   | <0.001               |
| Vaxzevria + Vaxzevria + Spikevax 61+    | <5    | 60      | 40  | -336 | 92  | .                    |

MLE, maximum likelihood estimate;

LCI/UCI, lower/upper limit of the 95% Wald confidence interval

<sup>1</sup> Likelihood-ratio test

**Supplementary Table 12: Negative control outcome analysis** Ratio comparing the hazard of injury, poisoning and certain other consequences of external causes in vaccinated study subjects with the corresponding hazard in the unvaccinated, adjusted for age, sex, region of residence, residence in a long-term care facility, influenza vaccination in 2019–2020, number of nights hospitalized between 2015 and 2019 and presence of predisposing comorbidities. Estimates marked by an asterisk are statistically significantly different from 1.

|                                         | Cases | P-years | MLE  | LCI  | UCI  | p-value <sup>1</sup> |
|-----------------------------------------|-------|---------|------|------|------|----------------------|
| Not vaccinated                          | 7795  | 240658  | .    | .    | .    | .                    |
| Comirnaty 0-20                          | 1293  | 40567   | 0.92 | 0.87 | 0.98 | .                    |
| Comirnaty 21-83                         | 3698  | 113799  | 0.93 | 0.88 | 0.98 | .                    |
| Comirnaty 84+                           | 483   | 9565    | 1.09 | 0.98 | 1.20 | .                    |
| Comirnaty + Comirnaty 0-13              | 924   | 26187   | 0.96 | 0.89 | 1.03 | .                    |
| Comirnaty + Comirnaty 14-90             | 5092  | 141577  | 0.98 | 0.93 | 1.03 | .                    |
| Comirnaty + Comirnaty 91-180            | 5025  | 153578  | 0.99 | 0.93 | 1.05 | .                    |
| Comirnaty + Comirnaty 181+              | 1189  | 28151   | 1.13 | 1.04 | 1.23 | .                    |
| Comirnaty + Comirnaty + Comirnaty 0-13  | 580   | 20288   | 1.00 | 0.90 | 1.11 | .                    |
| Comirnaty + Comirnaty + Comirnaty 14-60 | 1798  | 62529   | 1.03 | 0.94 | 1.11 | .                    |
| Comirnaty + Comirnaty + Comirnaty 61+   | 687   | 21550   | 1.01 | 0.90 | 1.12 | .                    |
| Comirnaty + Comirnaty + Spikevax 0-13   | 74    | 2683    | 1.05 | 0.83 | 1.34 | .                    |
| Comirnaty + Comirnaty + Spikevax 14-60  | 138   | 6353    | 0.87 | 0.72 | 1.05 | .                    |
| Comirnaty + Comirnaty + Spikevax 61+    | 25    | 491     | 1.43 | 0.96 | 2.14 | .                    |
| Spikevax 0-20                           | 225   | 4858    | 1.18 | 1.03 | 1.35 | .                    |
| Spikevax 21-83                          | 617   | 13686   | 1.13 | 1.04 | 1.24 | .                    |
| Spikevax 84+                            | 116   | 1538    | 1.53 | 1.27 | 1.85 | .                    |
| Spikevax + Spikevax 0-13                | 159   | 2992    | 1.28 | 1.09 | 1.50 | .                    |
| Spikevax + Spikevax 14-90               | 850   | 16066   | 1.29 | 1.19 | 1.40 | .                    |
| Spikevax + Spikevax 91-180              | 767   | 17008   | 1.23 | 1.13 | 1.34 | .                    |
| Spikevax + Spikevax 181+                | 145   | 2848    | 1.31 | 1.10 | 1.56 | .                    |
| Spikevax + Spikevax + Comirnaty 0-13    | 25    | 623     | 1.29 | 0.87 | 1.92 | .                    |
| Spikevax + Spikevax + Comirnaty 14-60   | 69    | 1846    | 1.23 | 0.96 | 1.57 | .                    |
| Spikevax + Spikevax + Comirnaty 61+     | 18    | 521     | 1.08 | 0.68 | 1.73 | .                    |
| Spikevax + Spikevax + Spikevax 0-13     | 78    | 1913    | 1.29 | 1.02 | 1.62 | .                    |
| Spikevax + Spikevax + Spikevax 14-60    | 224   | 5456    | 1.31 | 1.12 | 1.52 | .                    |
| Spikevax + Spikevax + Spikevax 61+      | 62    | 1317    | 1.33 | 1.02 | 1.73 | .                    |
| Vaxzevria 0-20                          | 57    | 2727    | 0.82 | 0.63 | 1.07 | .                    |
| Vaxzevria 21-83                         | 224   | 7908    | 1.03 | 0.90 | 1.18 | .                    |
| Vaxzevria 84+                           | 21    | 452     | 1.62 | 1.06 | 2.50 | .                    |
| Vaxzevria + Vaxzevria 0-13              | 35    | 1490    | 0.83 | 0.59 | 1.16 | .                    |
| Vaxzevria + Vaxzevria 14-90             | 200   | 8150    | 0.90 | 0.78 | 1.04 | .                    |
| Vaxzevria + Vaxzevria 91-180            | 213   | 8932    | 1.02 | 0.88 | 1.18 | .                    |
| Vaxzevria + Vaxzevria 181+              | 22    | 1080    | 0.95 | 0.62 | 1.45 | .                    |
| Vaxzevria + Vaxzevria + Comirnaty 0-13  | 22    | 893     | 1.19 | 0.78 | 1.81 | .                    |
| Vaxzevria + Vaxzevria + Comirnaty 14-60 | 49    | 2487    | 0.98 | 0.73 | 1.31 | .                    |
| Vaxzevria + Vaxzevria + Comirnaty 61+   | 6     | 372     | 0.82 | 0.37 | 1.85 | .                    |
| Vaxzevria + Vaxzevria + Spikevax 0-13   | 10    | 460     | 0.99 | 0.53 | 1.85 | .                    |
| Vaxzevria + Vaxzevria + Spikevax 14-60  | 27    | 1092    | 1.19 | 0.81 | 1.75 | .                    |
| Vaxzevria + Vaxzevria + Spikevax 61+    | <5    | 62      | 1.55 | 0.39 | 6.20 | .                    |

MLE, maximum likelihood estimate; LCI/UCI, lower/upper limit of the 95% Wald confidence interval

<sup>1</sup> Likelihood-ratio test

**Supplementary Figure 1: Distribution of SARS-CoV-2 variants by calendar month** A subset of SARS-CoV-2-positive specimens are regularly selected for sequencing to assess the distribution of SARS-CoV-2 variants in Finland. The results are recorded in the National Infectious Diseases Register. The figure shows the relative frequency of each variant between December 27, 2020, and February 19, 2022 in the subpopulation aged 70 years and over. The corresponding number of sequenced specimens as well as the percentage of specimens that were sequenced are given below the x-axis.

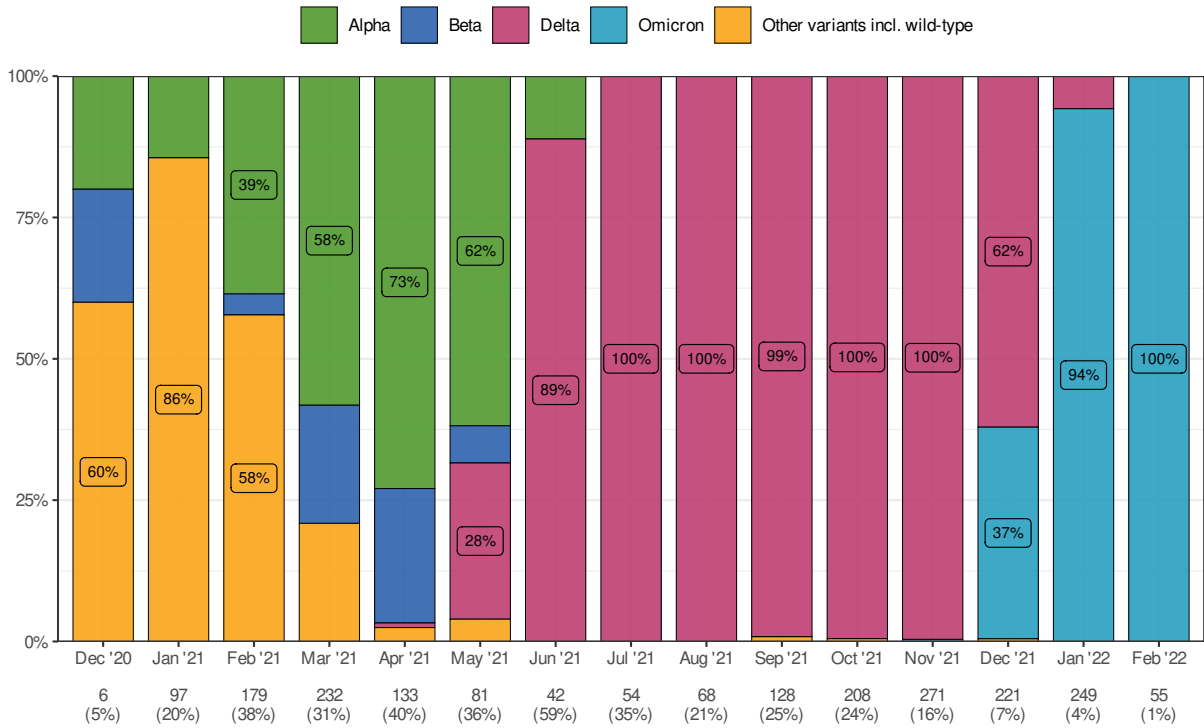

The Omicron subtype BA.2 accounted for 1% of all Omicron infections.

**Supplementary Figure 2: Distribution of exposure states by calendar month** Relative distribution of person-years in the study of vaccine effectiveness against Covid-19 hospitalization from December 27, 2020, to February 19, 2022.

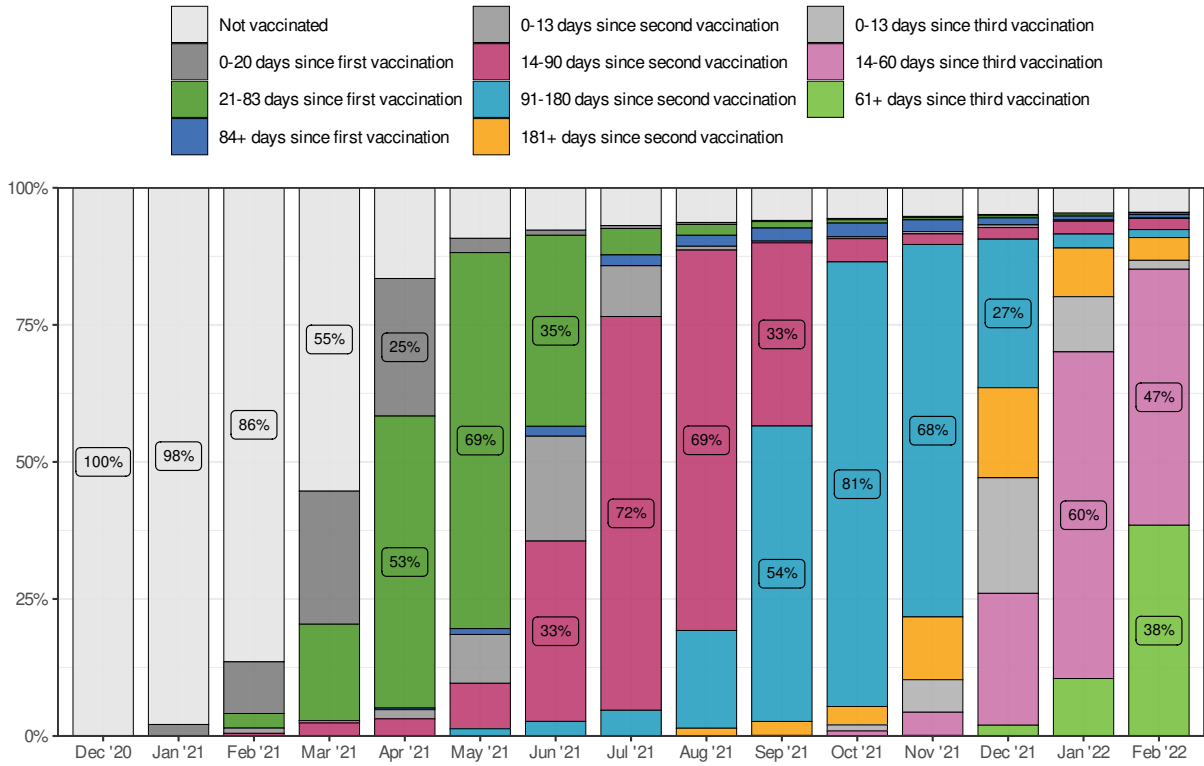

**Supplementary Figure 3: Number of cases by calendar month** Number of Covid-19-related hospital admissions and Covid-19-related ICU admissions in the study, i.e., between December 27, 2020, and February 19, 2022.

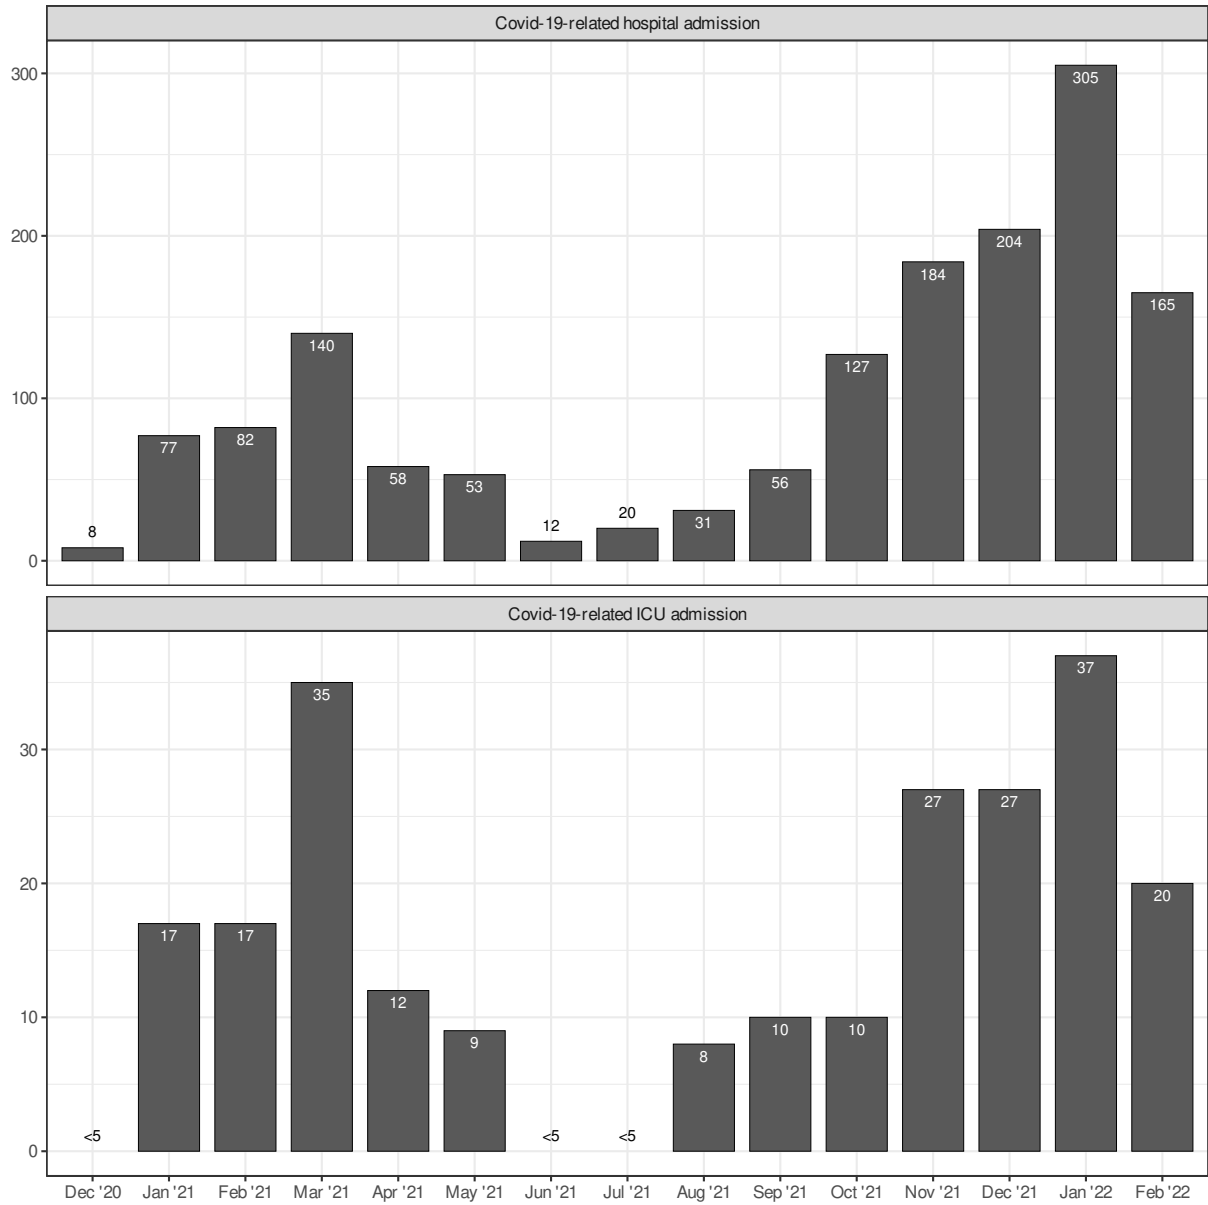

Supplement: Supplementary file [file media-1.pdf]
