# Supplementary material for: High vaccine effectiveness against severe Covid-19 in the elderly in Finland before and after the emergence of Omicron
Source: bioRxiv or medRxiv preprint supplement (doi:10.1101/2022.03.11.22272140), 2022-07-06
Supplement: Supplementary file [file media-2.pdf]

Professor Mika Salminen,  
Director of the Department for Health Security  
Finnish Institute for Health and Welfare / Terveyden ja Hyvinvoinnin Laitos  
[Mika.salminen@thl.fi](mailto:Mika.salminen@thl.fi)

To whom it may concern:

Subject: High vaccine effectiveness against severe Covid-19 in the elderly in Finland before and after the emergence of Omicron

As director of the department for Health security of the Finnish Institute for Health and Welfare, I certify that:

- I am the competent authority for assessing whether research requires institutional ethical review or if the Finnish communicable diseases law (Tartuntatautilaki 1227/2016) and the law on the duties of the Finnish institute for Health (Laki Terveyden ja hyvinvoinnin laitoksesta 668/2008) and Welfare allows the implementation of the research without seeking further ethical review.
- The research presented by Baum et al in “**High vaccine effectiveness against severe Covid-19 in the elderly in Finland before and after the emergence of Omicron**” did not require further ethical review before implementation as its aim was to monitor vaccine effectiveness of infectious disease (Tartuntatautilaki 1227/2016).



Helsinki, March 3rd 2022  
Prof Mika Salminen
